# Supplementary material for: The role of DNA (de)methylation in immune responsiveness of Arabidopsis
Source: PubMed Central journal article supplement (PMC5132069; doi:10.1111/tpj.13252), 2016-09-07
Supplement: TPJ-88-361-s003.pdf [file TPJ-88-361-s003.pdf]

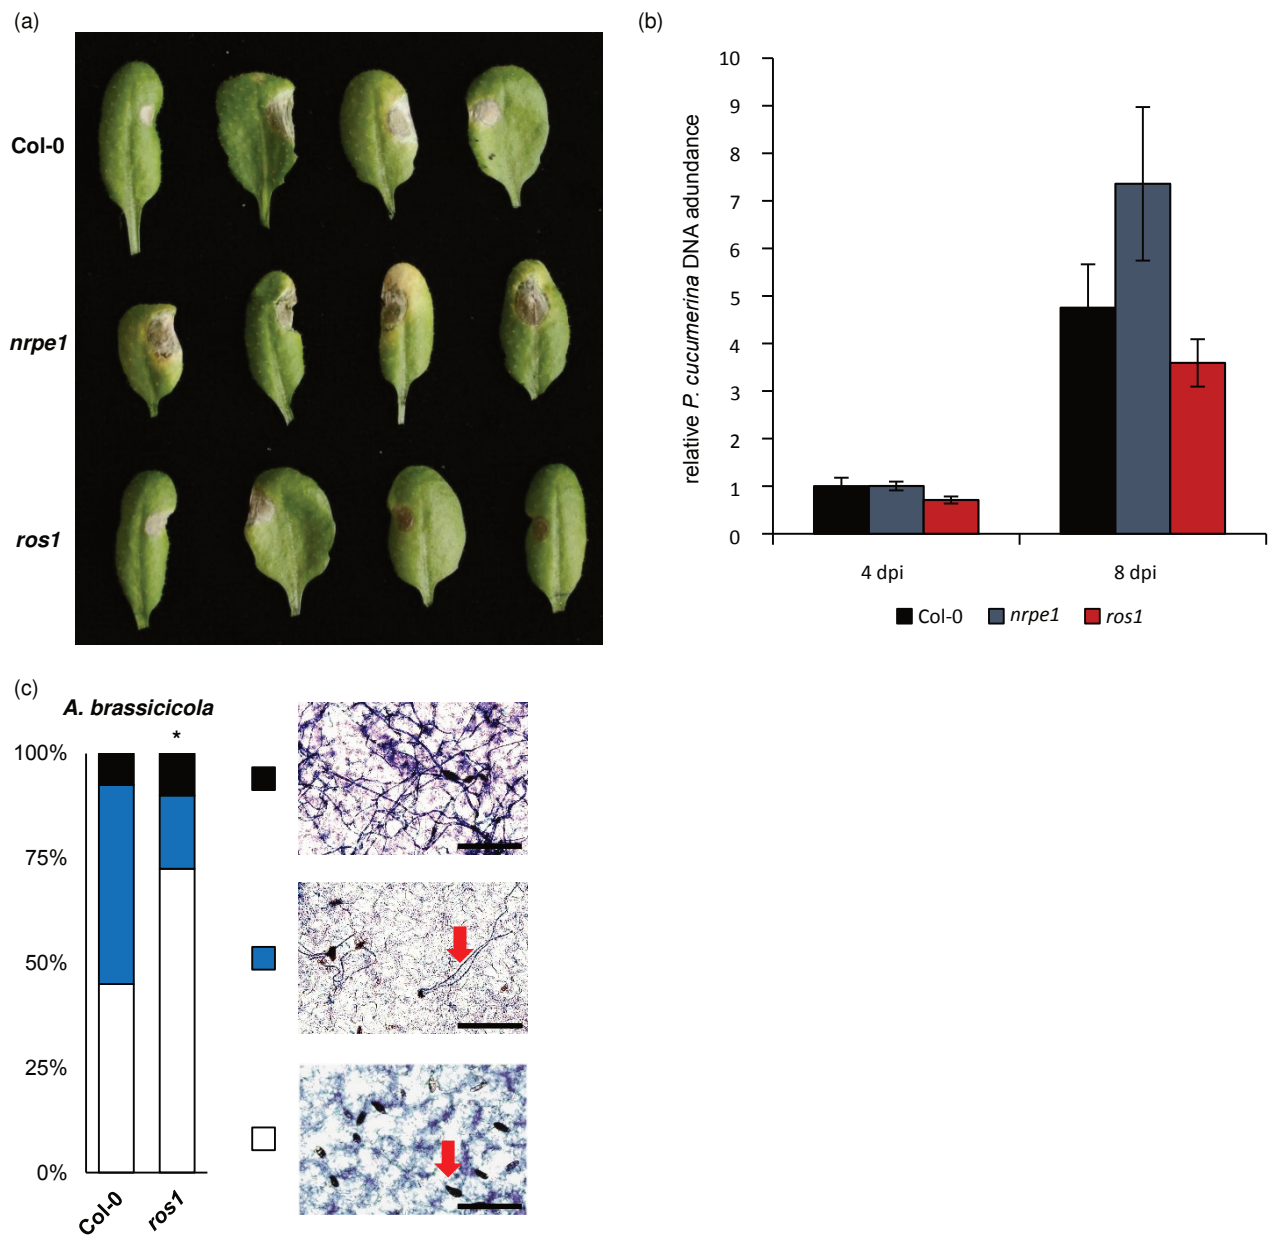

**Figure S3: Basal resistance phenotypes of Col-0, *nrpe1* and *ros1* to the necrotrophic fungi *Plectosphaerella cucumerina* and *Alternaria brassicicola*.** (a) Representative images of *P. cucumerina* lesion formation on Col-0, *nrpe1* and *ros1*. Quantification of diameters is presented in Figure 3a. (b) RT-qPCR-based estimation of the presence of *P. cucumerina* DNA relative to Arabidopsis DNA. Values are presented with Col-0 four days post-inoculation (dpi) as reference. (c) Susceptibility of *ros1* and Col-0 to *Alternaria brassicicola*. Plants were drop-inoculated at five weeks post germination with 6  $\mu$ l droplets of a  $10^6$  spores  $\text{ml}^{-1}$  spore suspension. At 14 days post inoculation, disease symptoms were assessed in a total of 40 leaves from 10 plants after trypan blue staining. Classes are defined as follows; lowest: no hyphal colonisation of the leaf – arrow indicates spore; intermediate: low/intermediate density of hyphal colonisation – arrow indicates hypha; highest: dense hyphal colonisation with a presence of necrotic lesions. The asterisk indicates a statistically significant difference in distribution of classes ( $\chi^2$  test,  $p < 0.05$ ). Scale bars: 100  $\mu$ m. *A. brassicicola* spores were prepared as described for *P. cucumerina* except *A. brassicicola* was grown on PDA-CaCO<sub>3</sub> plates.
