# Supplementary material for: The role of DNA (de)methylation in immune responsiveness of Arabidopsis
Source: PubMed Central journal article supplement (PMC5132069; doi:10.1111/tpj.13252), 2016-09-07
Supplement: TPJ-88-361-s004.pdf [file TPJ-88-361-s004.pdf]

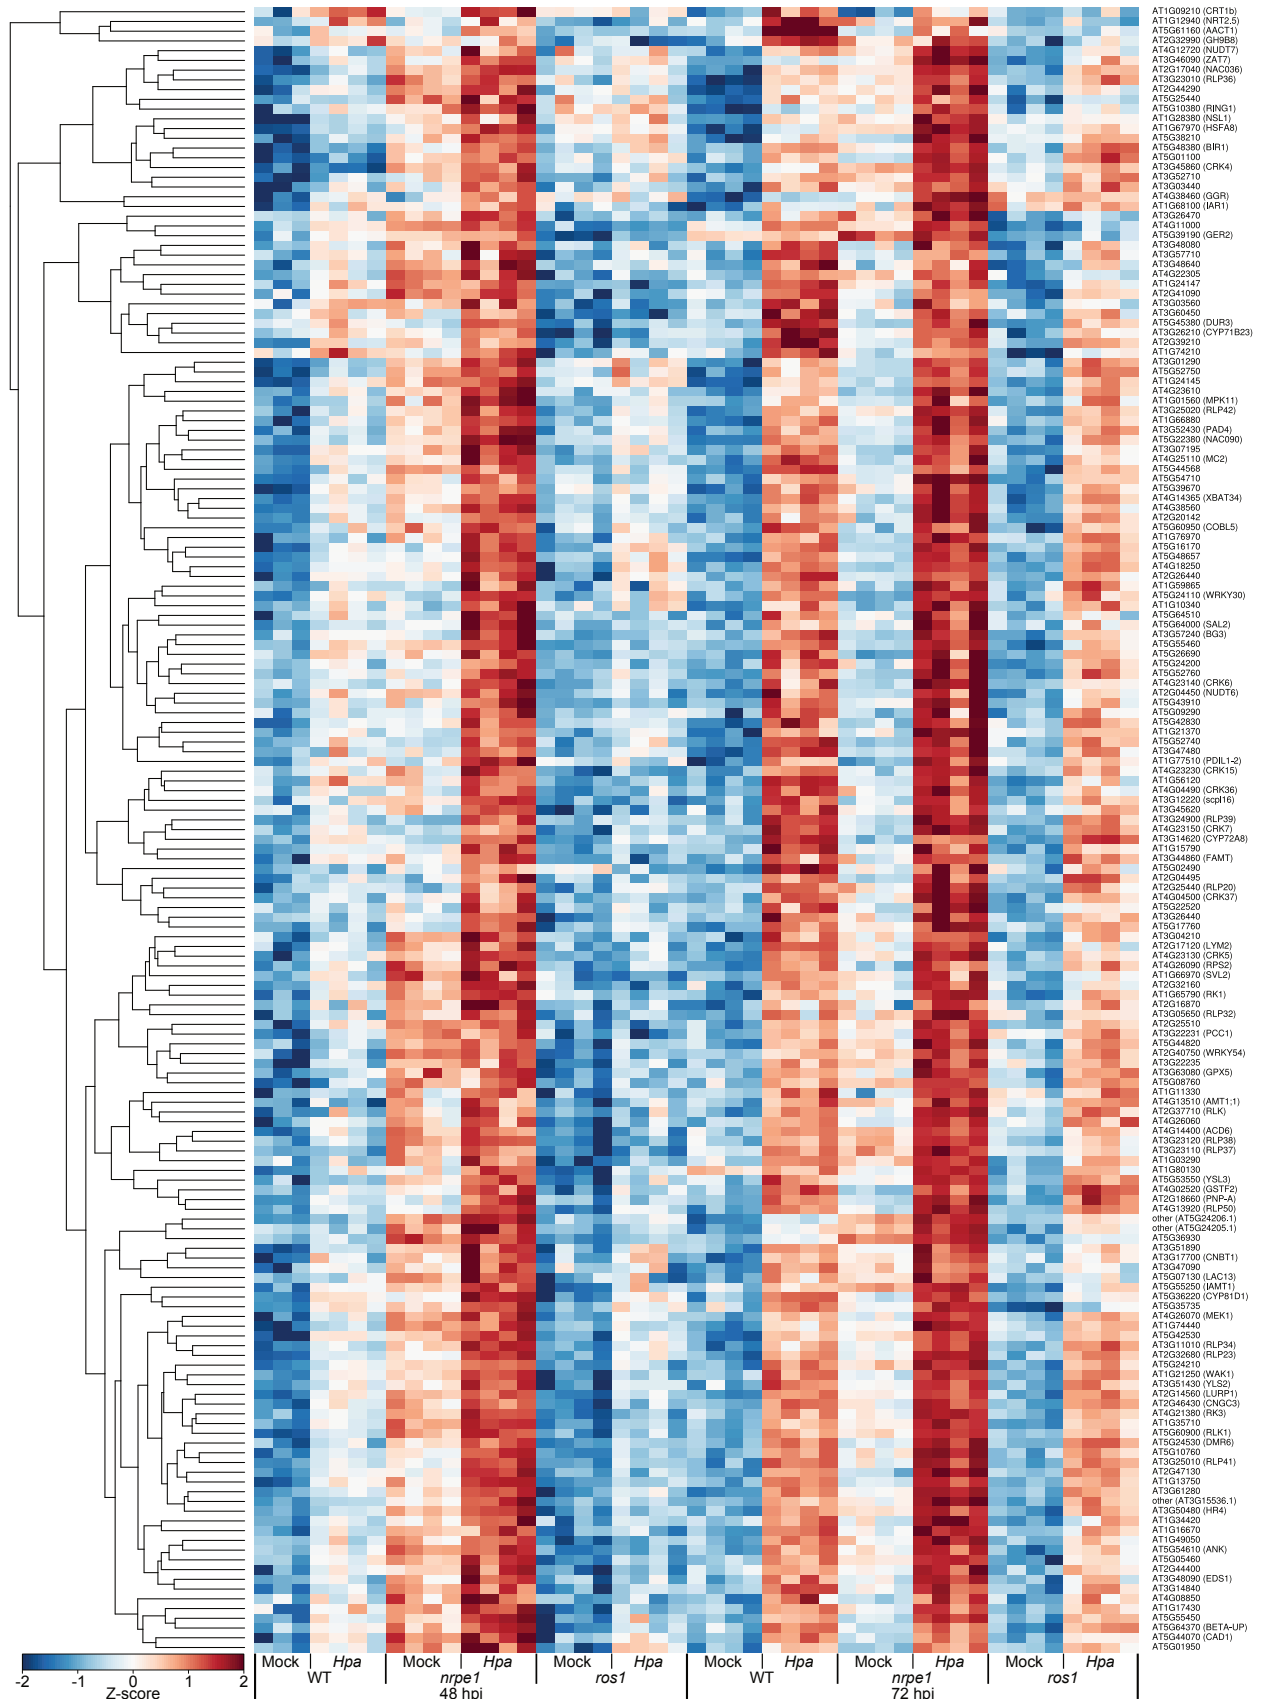

**Figure S4: Transcript levels of 166 *Hpa*-inducible genes with augmented induction in *nrpe1* and/or repressed induction in *ros1*.** Genes were selected when differentially expressed between *ros1* and *nrpe1*, as well as between Col-0 and *ros1*, and/or between Col-0 and *nrpe1*, at either 48 or 72 hours post-inoculation (hpi). Heat map projections represent Z-score of transcript levels.
