# Supplementary material for: The role of DNA (de)methylation in immune responsiveness of Arabidopsis
Source: PubMed Central journal article supplement (PMC5132069; doi:10.1111/tpj.13252), 2016-09-07
Supplement: TPJ-88-361-s005.pdf [file TPJ-88-361-s005.pdf]

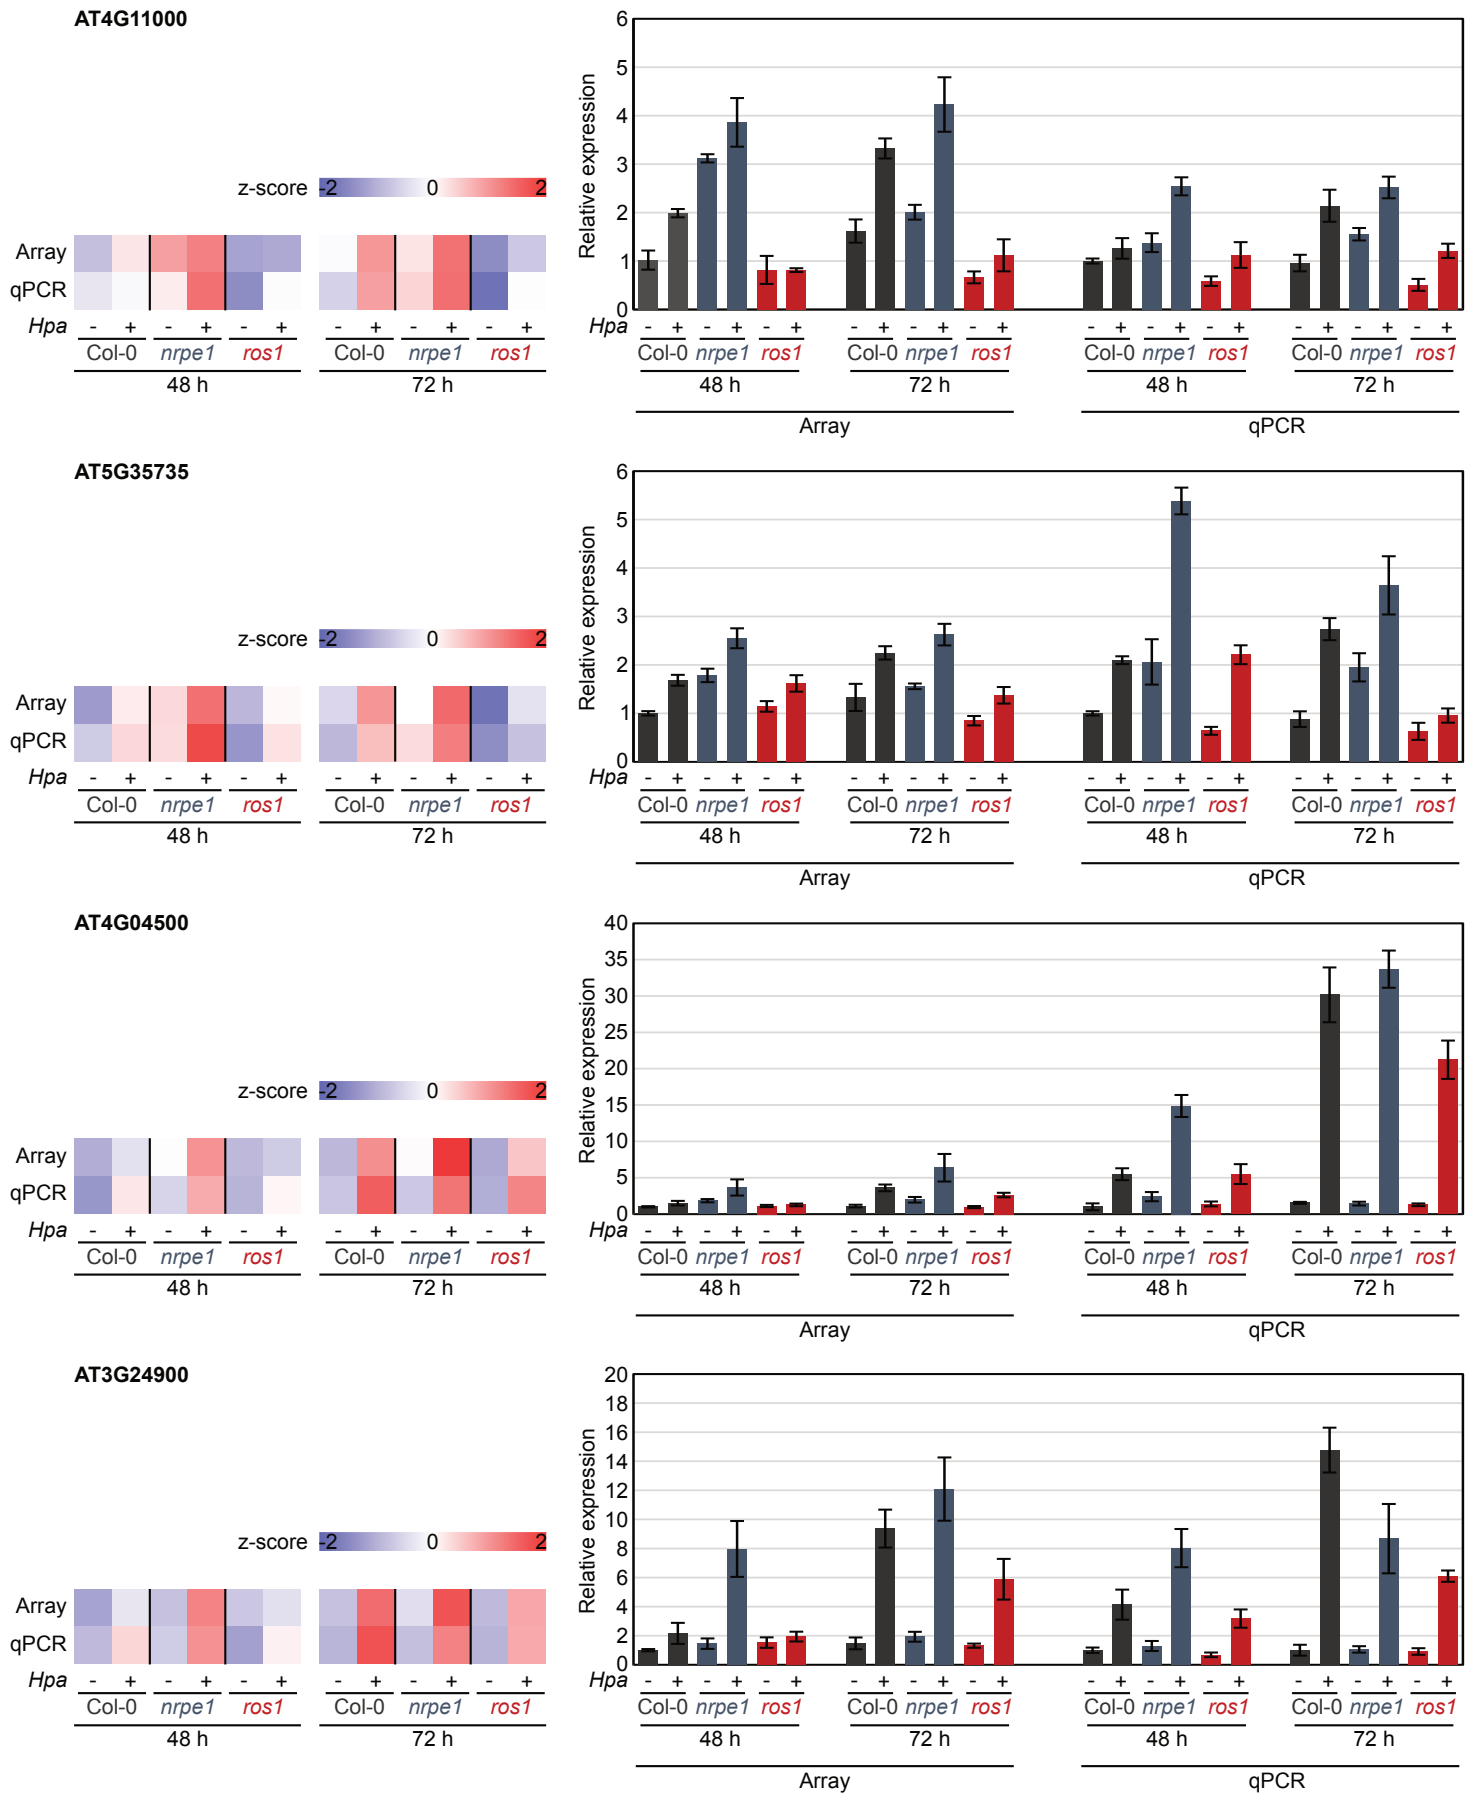

**Figure S5: Micro-array validation of transcriptional profiles from an independent *Hpa* experiment.** Heat maps visualise the z-scores derived from the RMA-normalised expression values from the array and the  $-\Delta Ct$  values from RT-qPCR experiments. Bar graphs show expression relative to mock-inoculated Col-0 at 48 hours post inoculation (hpi).
